# Supplementary material for: Comprehensive Characterization of Humoral Correlates of Human Immunodeficiency Virus 1 Superinfection Acquisition in High-risk Kenyan Women
Source: PubMed Central journal article supplement — eBioMedicine. 2017 Apr 7;18:216–24. doi: 10.1016/j.ebiom.2017.04.005 (PMC5405187; doi:10.1016/j.ebiom.2017.04.005), 2017-04-07

**Supplementary Table S1. Case and control participants**

| SI case | Window SI [midpoint] (dpi) | Env subtype (initial, SI) | Plasma control ID | Plasma sample timing (dpi) | Cervical control ID | Cervical swab sample timing (dpi) | Contemporaneous plasma VL (log copies/ml) |
|---------|----------------------------|---------------------------|-------------------|----------------------------|---------------------|-----------------------------------|-------------------------------------------|
| QA013*  | 264-385 [325]              | D, A                      |                   | 264                        |                     | 264                               | 5.28                                      |
|         |                            |                           | QC594             | 233                        | QC594               | 233                               | 5.55                                      |
|         |                            |                           | QC100             | 251                        | QC100               | 251                               | 2.68                                      |
|         |                            |                           | QD435             | 256.5                      | QD435               | 256.5                             | 4.29                                      |
| QA252*  | 1046-1487 [1267]           | D, ND                     |                   | 1046                       |                     | 1046                              | 3.67                                      |
|         |                            |                           | QA523             | 1065                       | QA523               | 1065                              | 5.01                                      |
|         |                            |                           | QC370             | 1057                       | QC370               | 1057                              | 5.20                                      |
|         |                            |                           | QC888             | 1031                       | QC888               | 1031                              | 5.57                                      |
| QA413*  | 714-1007 [861]             | A, A                      |                   | 714                        |                     | 714                               | 4.94                                      |
|         |                            |                           | QA584             | 717.5                      | QA584               | 717.5                             | 4.64                                      |
|         |                            |                           | QD976             | 709.5                      | QD976               | 709.5                             | 3.23                                      |
|         |                            |                           | QH372             | 712                        | QH372               | 712                               | 3.76                                      |
| QB008*  | 303.5-591.5 [448]          | C, C/A                    |                   | 303.5                      |                     | 303.5                             | 4.52                                      |
|         |                            |                           | QC406             | 262                        | QC406               | 262                               | 5.06                                      |
|         |                            |                           | QH301             | 354.5                      | QH301               | 354.5                             | 4.73                                      |
|         |                            |                           | QD370             | 278.5                      | QD370               | 278.5                             | 4.22                                      |
| QB045*  | 1680-2048 [1864]           | A, A                      |                   | 1680                       |                     | 1680                              | 4.49                                      |
|         |                            |                           | QB585             | 1680.5                     | QB585               | 1680.5                            | 3.34                                      |
|         |                            |                           | QB765             | 1679                       | QB765               | 1679                              | 4.32                                      |
|         |                            |                           | QD595             | 1677.5                     | QD595               | 1677.5                            | 4.45                                      |
| QB210   | 17-163 [90]                | D, D                      |                   | 17                         |                     |                                   | 4.93                                      |
|         |                            |                           | QA465             | 17                         |                     |                                   | 6.53                                      |

|        |                |       |       |       |       |       |      |
|--------|----------------|-------|-------|-------|-------|-------|------|
|        |                |       | QB857 | 17    |       | 4.75  |      |
|        |                |       | QC048 | 17    |       | 5.30  |      |
| QB609  | 101-485 [293]  | D, A  |       |       | 101   | -     |      |
|        |                |       |       |       | QB857 | 69    | 4.17 |
|        |                |       |       |       | QC048 | 73    | 5.05 |
|        |                |       |       |       | QH349 | 126   | -    |
| QB685* | 303-1453 [878] | A, ND |       | 303   | 275   | 2.79  |      |
|        |                |       | QA101 | 275   | QA101 | 275   | 5.60 |
|        |                |       | QC805 | 271   | QC805 | 271   | 4.79 |
|        |                |       | QH359 | 271   | QH359 | 271   | 4.57 |
| QB726* | 749-1031 [890] | A, A  |       | 749   | 749   | 4.07  |      |
|        |                |       | QA918 | 749   | QA918 | 749   | 5.32 |
|        |                |       | QD399 | 751.5 | QD399 | 751.5 | 4.39 |
|        |                |       | QF575 | 743.5 | QF575 | 743.5 | 4.66 |
| QB850  | 52-73 [63]     | A, D  |       | 52    | 52    | 5.22  |      |
|        |                |       | QA595 | 53    | QA595 | 53    | 4.81 |
|        |                |       | QB868 | 53    | QB868 | 53    | 4.76 |
|        |                |       | QF815 | 53    | QF815 | 53    | 4.71 |
| QC369  | 29-143 [86]    | A, A  |       | 29    | 29    | -     |      |
|        |                |       | QD224 | 29    | QD224 | 29    | 5.19 |
|        |                |       | QG958 | 31    | QG958 | 31    | 3.28 |
|        |                |       | QH646 | 25.5  | QH646 | 25.5  | 3.78 |
| QC858* | 341-440 [391]  | D, ND |       | 341   | 341   | 4.29  |      |
|        |                |       | QA560 | 350   | QA560 | 350   | 3.78 |
|        |                |       | QB216 | 336.5 | QB216 | 336.5 | 4.14 |

|        |                  |       |       |        |       |        |      |
|--------|------------------|-------|-------|--------|-------|--------|------|
|        |                  |       | QC344 | 317    | QC344 | 317    | 4.30 |
| QC885  | 58-152 [105]     | A, ND |       | 58     |       | 58     | 5.56 |
|        |                  |       | QB461 | 60     | QB461 | 60     | 5.58 |
|        |                  |       | QD359 | 58     | QD359 | 58     | 5.24 |
|        |                  |       | QD416 | 58.5   | QD416 | 58.5   | 4.44 |
| QD022* | 1832-1957 [1895] | A, C  |       | 1832   |       | 1832   | 4.30 |
|        |                  |       | QA261 | 1839   | QA261 | 1839   | 5.50 |
|        |                  |       | QA520 | 1829.5 | QA520 | 1829.5 | 5.75 |
|        |                  |       | QC440 | 1824.5 | QC440 | 1824.5 | 5.99 |
| QD149* | 996-1086 [1041]  | A, A  |       | 996    |       | 996    | 3.00 |
|        |                  |       | QB554 | 995    | QB554 | 995    | 4.28 |
|        |                  |       | QC036 | 998.5  | QC036 | 998.5  | 5.66 |
|        |                  |       | QG501 | 989.5  | QG501 | 989.5  | 5.20 |
| QD151* | 241-801 [521]    | A, A  |       | 241    |       | 213    | 5.14 |
|        |                  |       | QB424 | 214    | QB424 | 214    | 5.23 |
|        |                  |       | QF446 | 211    | QF446 | 211    | 5.26 |
|        |                  |       | QF927 | 211.5  | QF927 | 211.5  | 5.35 |
| QD696  | 49-174 [112]     | A, A  |       | 49     |       |        | 6.16 |
|        |                  |       | QA842 | 49     |       |        | 5.43 |
|        |                  |       | QC511 | 47     |       |        | 4.20 |
|        |                  |       | QG658 | 50.5   |       |        | 5.34 |
| QF441* | 255-444 [350]    | A, A  |       | 255    |       | 255    | 5.20 |
|        |                  |       | QC808 | 250.5  | QC808 | 250.5  | 5.62 |
|        |                  |       | QD342 | 251.5  | QD342 | 251.5  | 4.65 |
|        |                  |       | QD774 | 266.5  | QD774 | 266.5  | 5.25 |

|        |               |      |       |       |       |       |      |
|--------|---------------|------|-------|-------|-------|-------|------|
| QF564  | 17-1270 [644] | A, A |       | 17    |       | 6.60  |      |
|        |               |      | QB680 | 17    |       | 7.26  |      |
|        |               |      | QC914 | 17    |       | 5.93  |      |
|        |               |      | QH209 | 17    |       | 4.01  |      |
| QG262  | 59-144 [81]   | A, A |       | 59    |       | 3.45  |      |
|        |               |      | QA966 | 57    |       | 5.64  |      |
|        |               |      | QC152 | 63    |       | 6.09  |      |
|        |               |      | QF441 | 59    |       | 4.73  |      |
| QG284* | 155-260 [208] | A, A |       | 155   | 155   | 4.07  |      |
|        |               |      | QC168 | 165   | QC168 | 165   | 5.90 |
|        |               |      | QC449 | 151   | QC449 | 151   | 5.89 |
|        |               |      | QH381 | 153.5 | QH381 | 153.5 | 4.37 |

\* case-control sets included in neutralization assays  
SI = superinfection, VL = viral load, dpi = days post-infection

**Supplementary Table S2. Analysis of interaction between gp140 IgA binding and IgG binding and ADCC**

| <b>Correlate</b>                    | <b>OR</b> | <b>95% CI</b> | <b>p-value</b> | <b>aOR<sup>§</sup></b> | <b>95% CI</b> | <b>p-value</b> |
|-------------------------------------|-----------|---------------|----------------|------------------------|---------------|----------------|
| ^V1V2 IgG * gp140 IgA interaction   | 1.29      | 0.54-3.11     | 0.57           | 0.60                   | 0.15-2.35     | 0.46           |
| Plasma ADCC * gp140 IgA interaction | 0.92      | 0.18-4.80     | 0.92           | 0.89                   | 0.18-4.57     | 0.89           |

N = 20 cases, 60 controls for all analyses

^dichotomized detectable vs. undetectable

§ adjusted for VL

CI = confidence interval, OR = odds ratio, SI = superinfection

**Supplementary Table S3. Sensitivity analysis restricted to samples 180 days or more since initial infection**

| <b>Correlate</b>                     | <b>OR</b> | <b>95% CI</b> | <b>p-value</b> | <b>aOR<sup>§</sup></b> | <b>95% CI</b> | <b>p-value</b> |
|--------------------------------------|-----------|---------------|----------------|------------------------|---------------|----------------|
| Plasma neutralization breadth        | 1.00      | 0.52-1.93     | 1.00           | 1.31                   | 0.71-2.41     | 0.38           |
| Plasma neutralization potency        | 0.93      | 0.75-1.16     | 0.53           | 0.98                   | 0.75-1.29     | 0.89           |
| Plasma ADCC activity                 | 0.46      | 0.06-3.42     | 0.45           | 1.24                   | 0.11-13.53    | 0.86           |
| Cervical ADCC activity               | 1.19      | 0.52-2.71     | 0.68           | 1.18                   | 0.52-2.69     | 0.69           |
| Plasma V1V2 IgG binding <sup>^</sup> |           |               |                |                        |               |                |
| ZM109                                | 1.13      | 0.29-4.41     | 0.86           | 1.34                   | 0.32-5.66     | 0.69           |
| ZM53                                 | 0.67      | 0.17-2.73     | 0.58           | 0.83                   | 0.18-3.73     | 0.80           |
| case A2                              | 1.13      | 0.29-4.45     | 0.86           | 1.25                   | 0.28-5.59     | 0.78           |
| average                              | 0.67      | 0.17-2.73     | 0.58           | 0.83                   | 0.18-3.73     | 0.80           |
| Plasma gp140 IgA binding             | 0.83      | 0.47-1.46     | 0.51           | 0.50                   | 0.21-1.23     | 0.94           |

N = 12 cases, 36 controls for all analyses

<sup>^</sup>dichotomized detectable vs. undetectable

<sup>§</sup> adjusted for VL

aOR = adjusted odds ratio, CI = confidence interval, OR = odds ratio, SI = superinfection

**Supplementary Table S4. Sensitivity analysis restricted to intra-subtype superinfection cases**

| <b>Correlate</b>                     | <b>N (case, control)</b> | <b>OR</b> | <b>95% CI</b> | <b>p-value</b> | <b>aOR<sup>§</sup></b> | <b>95% CI</b> | <b>p-value</b> |
|--------------------------------------|--------------------------|-----------|---------------|----------------|------------------------|---------------|----------------|
| Plasma neutralization breadth        | 10, 30                   | 0.75      | 0.37-1.53     | 0.43           | 1.05                   | 0.51-2.19     | 0.89           |
| Plasma neutralization potency        | 10, 30                   | 0.89      | 0.66-1.19     | 0.43           | 0.96                   | 0.58-1.58     | 0.87           |
| Plasma ADCC activity                 | 12, 36                   | 1.32      | 0.07-24.71    | 0.85           | 1.93                   | 0.11-34.59    | 0.58           |
| Cervical ADCC activity               | 12, 36                   | 0.96      | 0.38-2.46     | 0.94           | 1.08                   | 0.43-2.72     | 0.88           |
| Plasma V1V2 IgG binding <sup>^</sup> |                          |           |               |                |                        |               |                |
| ZM109                                | 12, 36                   | 0.67      | 0.15-2.91     | 0.59           | 0.62                   | 0.27-1.42     | 0.42           |
| ZM53                                 | 12, 36                   | 0.81      | 0.14-4.85     | 0.82           | 0.80                   | 0.14-4.57     | 0.80           |
| case A2                              | 12, 36                   | 0.83      | 0.15-4.55     | 0.83           | 0.83                   | 0.14-4.75     | 0.83           |
| average                              | 12, 36                   | 0.49      | 0.11-2.25     | 0.36           | 0.45                   | 0.10-2.05     | 0.30           |
| Plasma gp140 IgA binding             | 12, 36                   | 0.48      | 0.18-1.29     | 0.15           | 0.50                   | 0.19-1.31     | 0.16           |

<sup>^</sup>dichotomized detectable vs. undetectable

<sup>§</sup> adjusted for VL

aOR = adjusted odds ratio, CI = confidence interval, OR = odds ratio, SI = superinfection

## Supplementary Figure S1. Plasma (a) and cervical (b) total IgG titer.

Colors and symbols represent superinfection cases (study identification numbers displayed) and their matched singly infected controls. P-values are from conditional logistic regression.

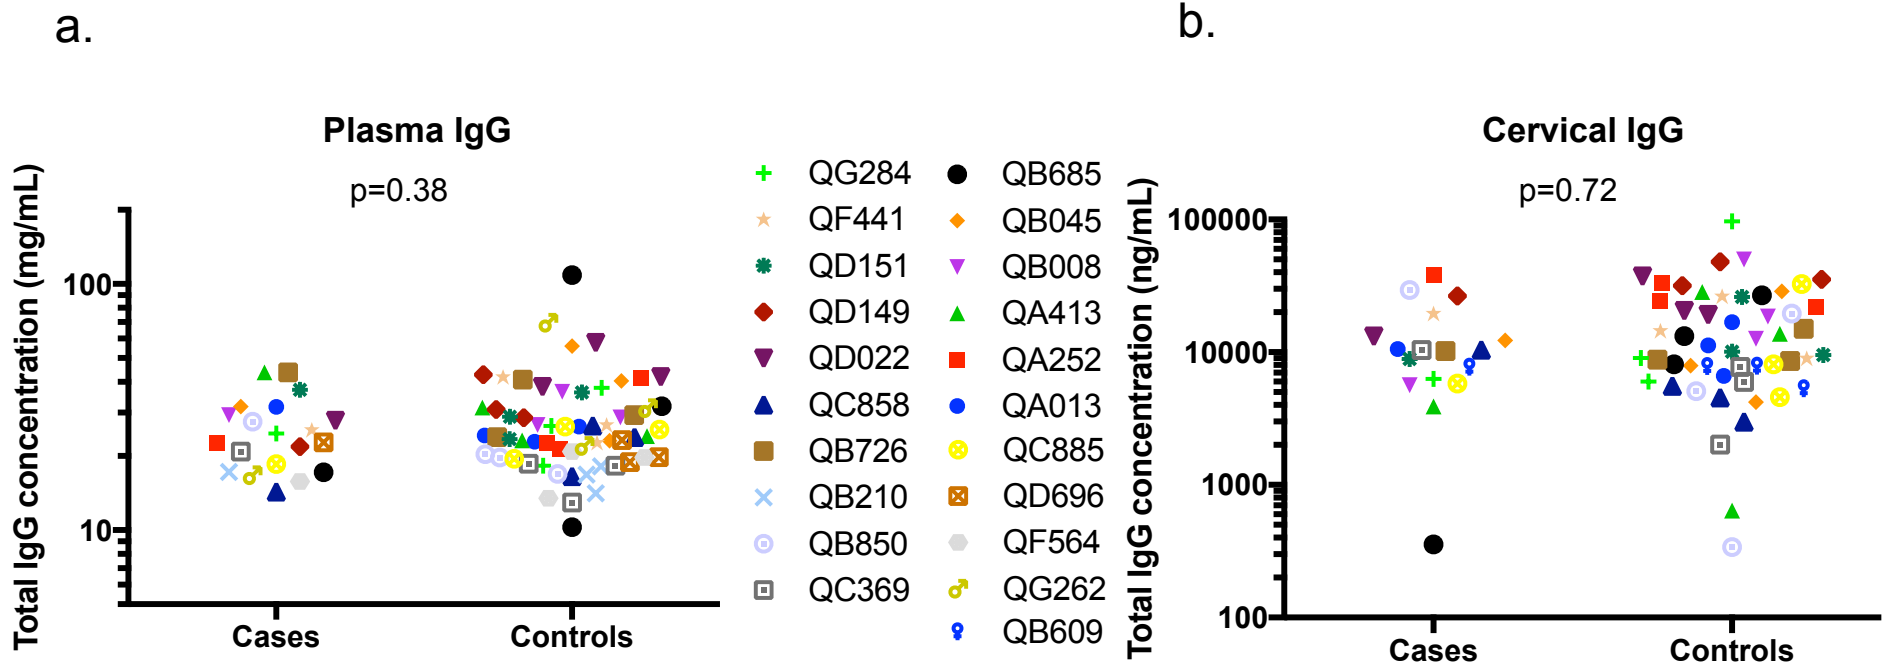

Supplement: mmc1.pdf [file mmc1.pdf]
